# Supplementary material for: Terbium-doped LiYbF4nanomaterial-based scintillator responding to X-rays with high-resolution imaging applications
Source: Royal Society of Chemistry journal article supplement (doi:10.1039/d2ce00075j), 2022-01-01

## Supporting information

### **Terbium Doping LiYbF<sub>4</sub> Nanomaterial-based Scintillator Responding to X-ray with Application of High-resolution Imaging**

*Xi Chen<sup>a,b</sup>, Hao Lu<sup>c</sup>, Qi Gu<sup>a,b</sup>, Nan Zhang<sup>a,b</sup>, Shuaihua Wang<sup>a,d,\*</sup>, Shaofan Wu<sup>a,d</sup>*

a Key Laboratory of Optoelectronic Materials Chemistry and Physics, Fujian Institute  
of Research on the Structure of Matter, Chinese Academy of Sciences, Fuzhou

350002, P. R. China

b University of Chinese Academy of Sciences, Beijing 100049, P.R. China

c College of Chemistry and Materials Science, Fujian Normal University, Fuzhou

350117, China

d Fujian Science & Technology Innovation Laboratory for Optoelectronic

Information of China, Fuzhou, Fujian 350108, P. R. China

Fig. S1: Partial TEM image of  $\text{LiYbF}_4:15\%\text{Tb}$  NCs, and the crystal quality is good without defects

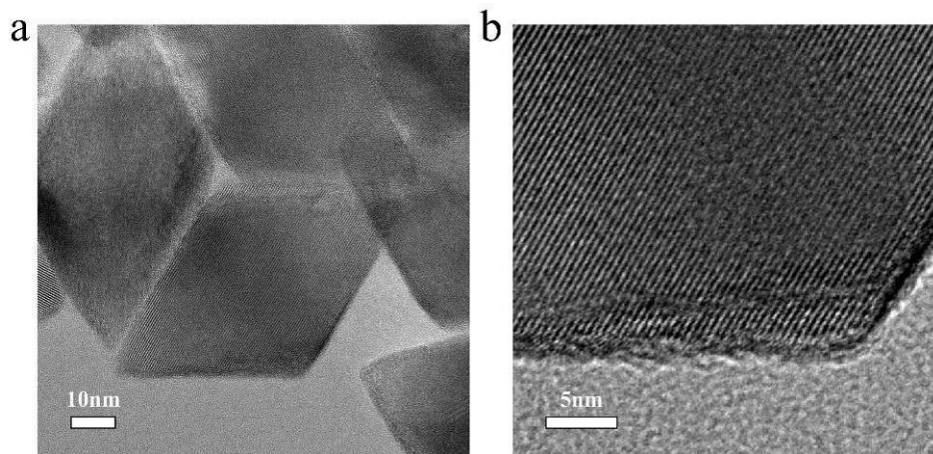

Fig. S2: The fluorescence emission spectrum and excitation spectrum of  $\text{LiYbF}_4:15\%\text{Tb}$  NCs

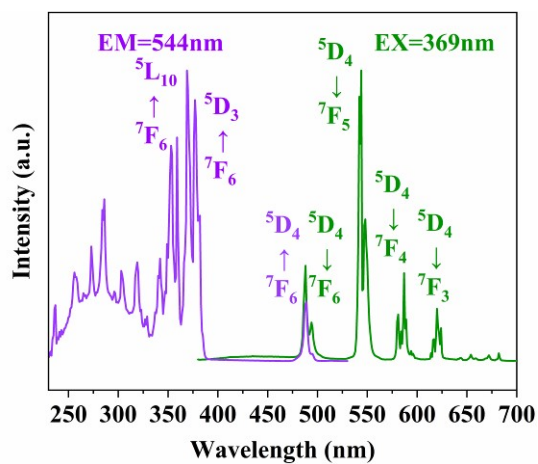

Fig. S3: The energy level transition process of  $\text{Tb}^{3+}$

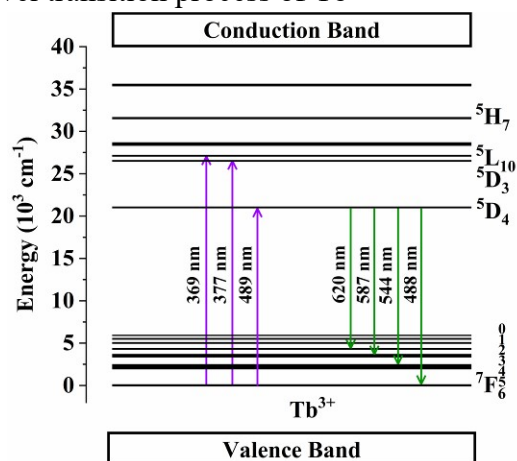

Fig. S4: The radioluminescence spectra of  $\text{LiYbF}_4:15\%\text{Tb}$  NCs (a) and BGO (b) at a voltage of 50kV and a dose rate of  $8.197\text{mGy/s} \sim 42.29\text{mGy/s}$

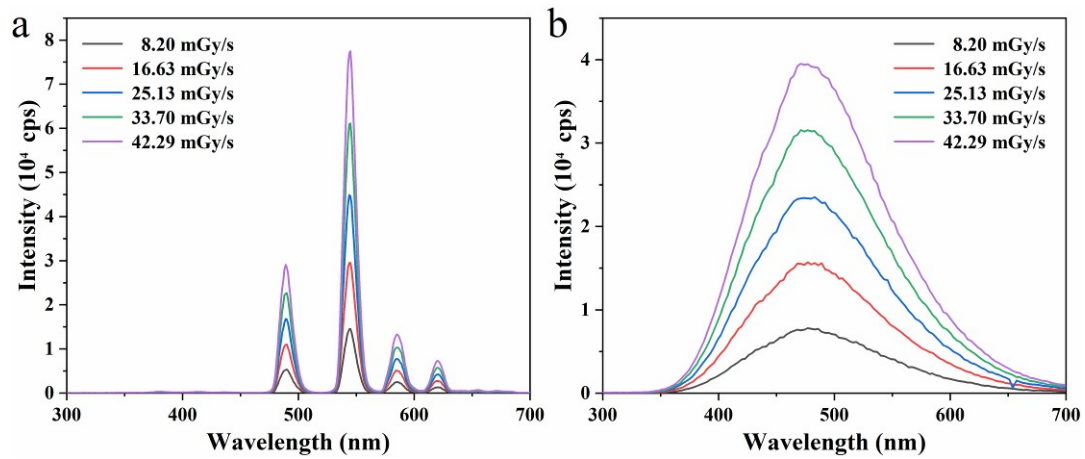

Fig. S5: The XEL of LiYbF<sub>4</sub>:15%Tb NCs (a), CsPbBr<sub>3</sub> (b) and BGO (c)

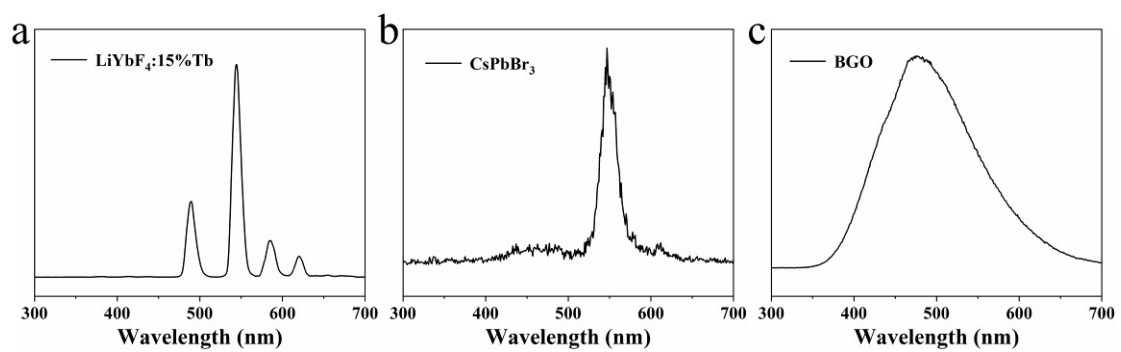

Fig. S6: The TG curve of LiYbF<sub>4</sub>:15%Tb NCs ranges from 30-1200°C

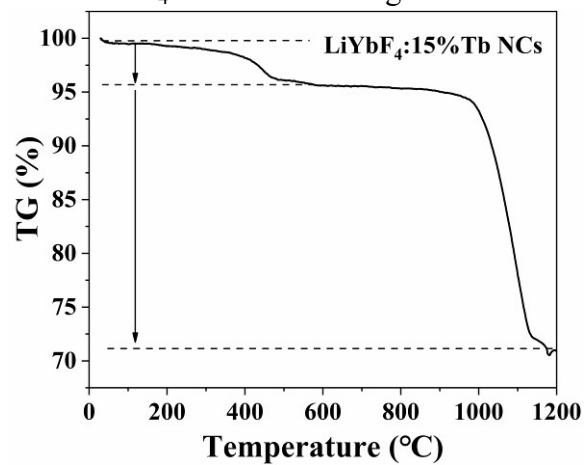

Fig. S7: The changes in the XEL of LiYbF<sub>4</sub>:15%Tb NCs after 172 days in the air

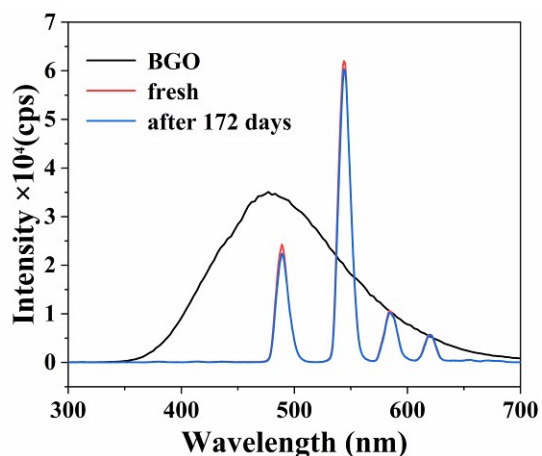

Fig. S8: The physical image of 40wt% LiYbF<sub>4</sub>:15%Tb scintillation film

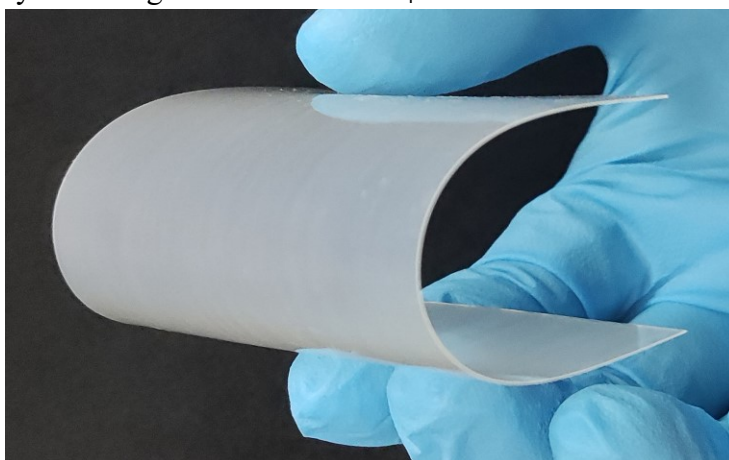

Fig. S9: The radioluminescence spectra of LiYbF<sub>4</sub>:15%Tb NCs and LiYbF<sub>4</sub>:15%Tb scintillation films at a dose rate of 42.29mGy/s and a voltage of 50kV

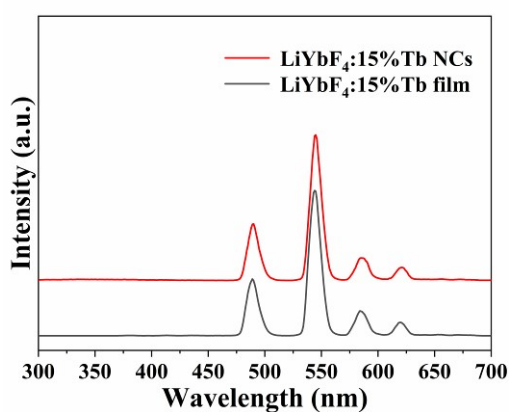

Fig. S10: Physical picture of 0wt%, 10wt%, 20wt%, 30wt%, 40wt% and 50wt% load

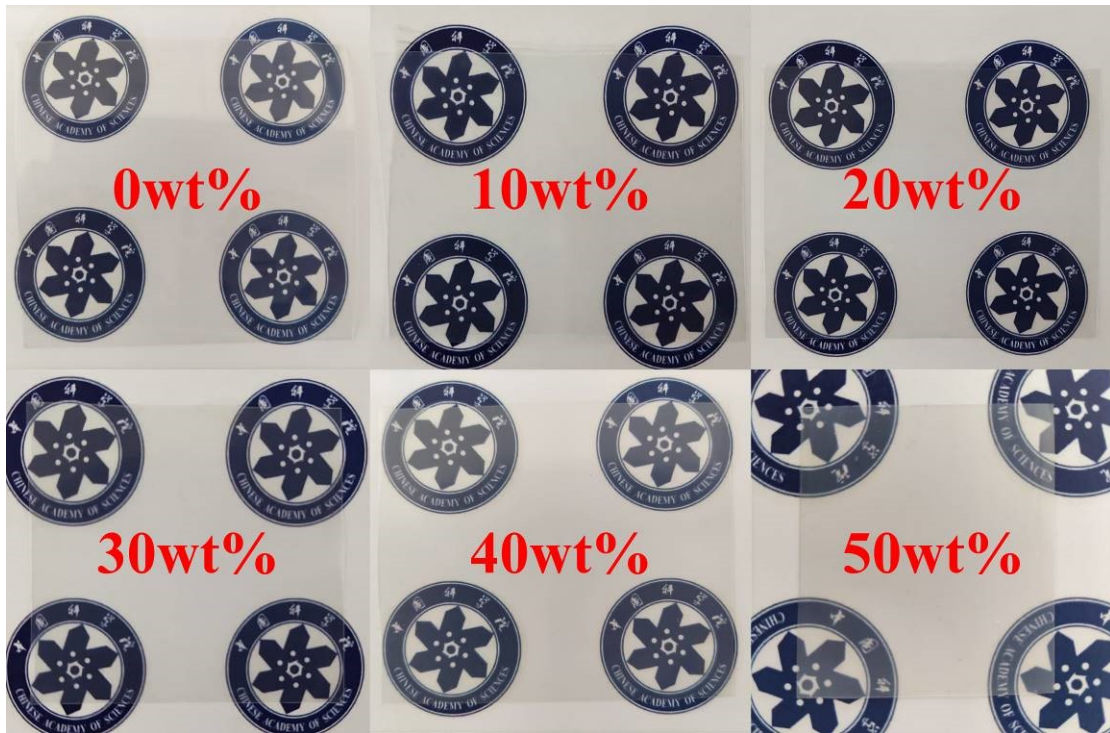

Fig. S11: The physical image of 50wt%  $\text{LiYbF}_4:15\%\text{Tb}$  scintillation film under natural light (left) and X-ray (right)

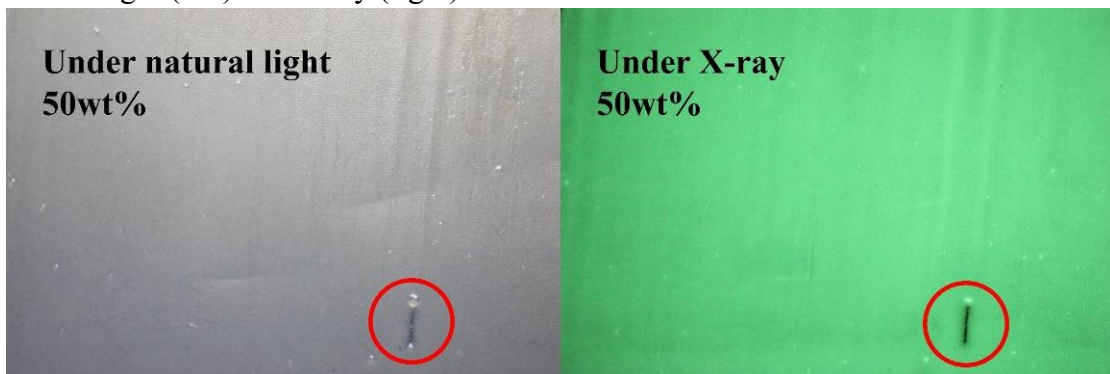

Fig. S12: The stability of the  $\text{LiYbF}_4:15\%\text{Tb}$  scintillation film at a dose rate of 12.4mGy/s for 2700s

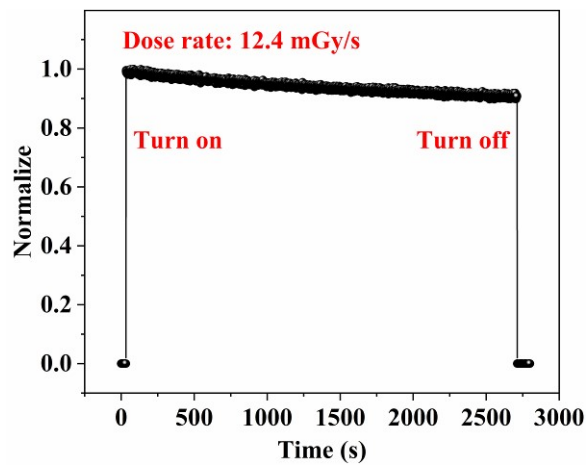

Fig. S13: X-ray imaging system



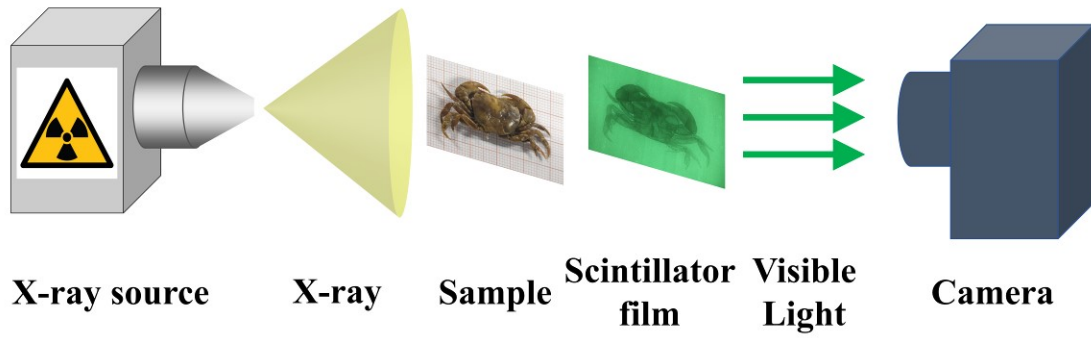

Fig. S14: BGO scintillation film under natural light (left) and X-ray (right)

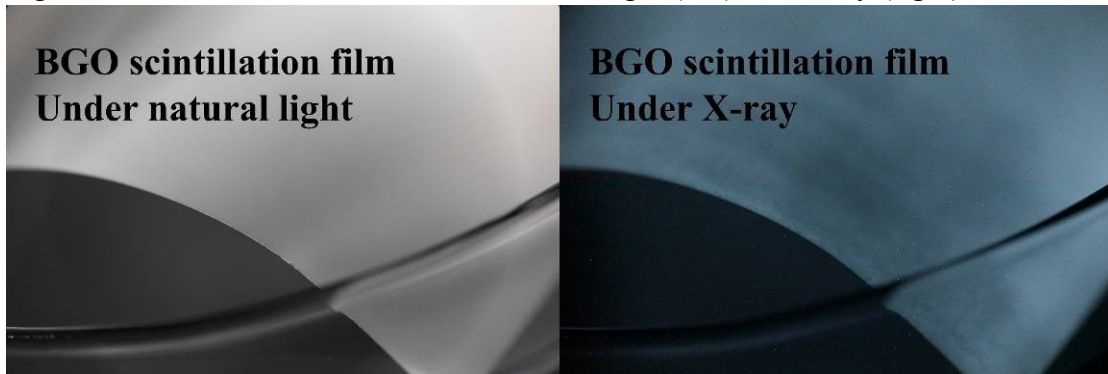

Fig. S15: The grayscale image at 10-20LP/mm of  $\text{LiYbF}_4:15\%\text{Tb}$  scintillation film

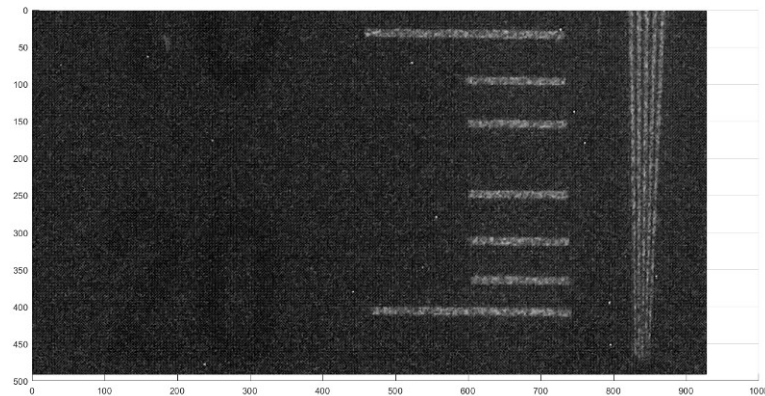

Fig. S16: The grayscale image at 3-10LP/mm of BGO scintillation film

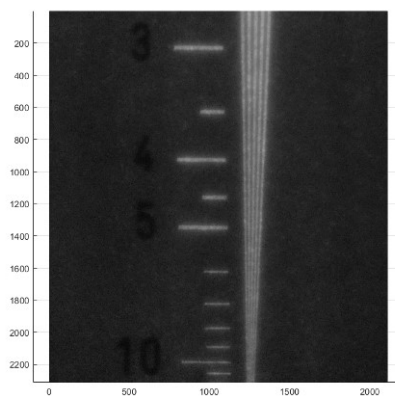

Fig. S17: The stripe brightness extraction map of  $\text{LiYbF}_4:15\%\text{Tb}$  scintillation film at

14-20LP/mm. Each peak corresponds to a bright fringe and a trough corresponds to a dark fringe

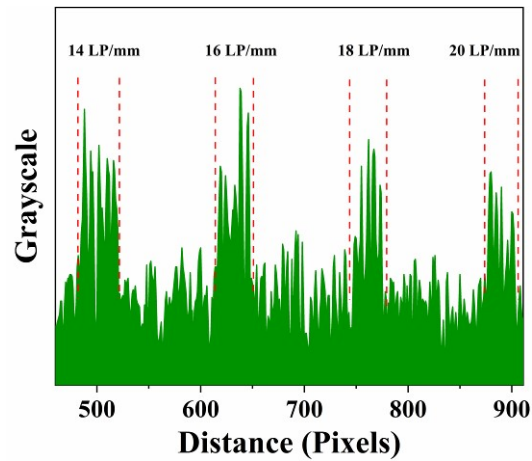

Fig. S18: The stripe brightness extraction map of BGO scintillation film at 4.5-8LP/mm

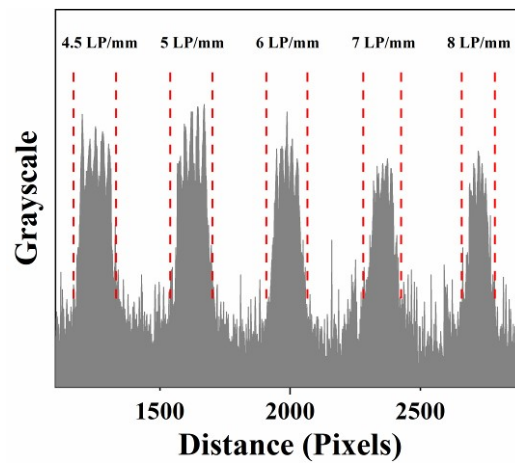

Fig. S19: The X-ray imaging of the data line at a dose rate of 42.29mGy/s and a voltage of 50kV. Metal and plastic are clearly distinguishable in the X-ray image

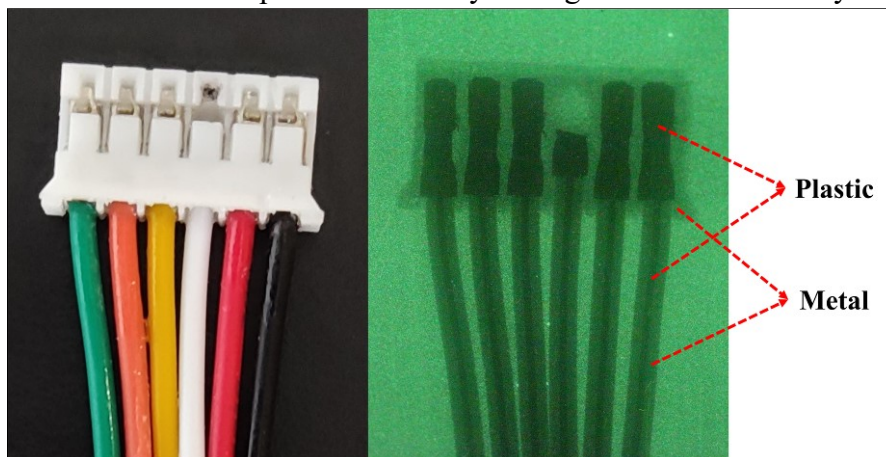

Supplement: d2ce00075j1.pdf [file d2ce00075j1.pdf]
